# Supplementary material for: Association between metabolites in tryptophan-kynurenine pathway and inflammatory bowel disease: a two-sample Mendelian randomization
Source: PubMed Central journal article supplement (PMC10761717; doi:10.1038/s41598-023-50990-9), 2024-01-02
Supplement: 41598_2023_50990_MOESM3_ESM.pdf [file 41598_2023_50990_MOESM3_ESM.pdf]

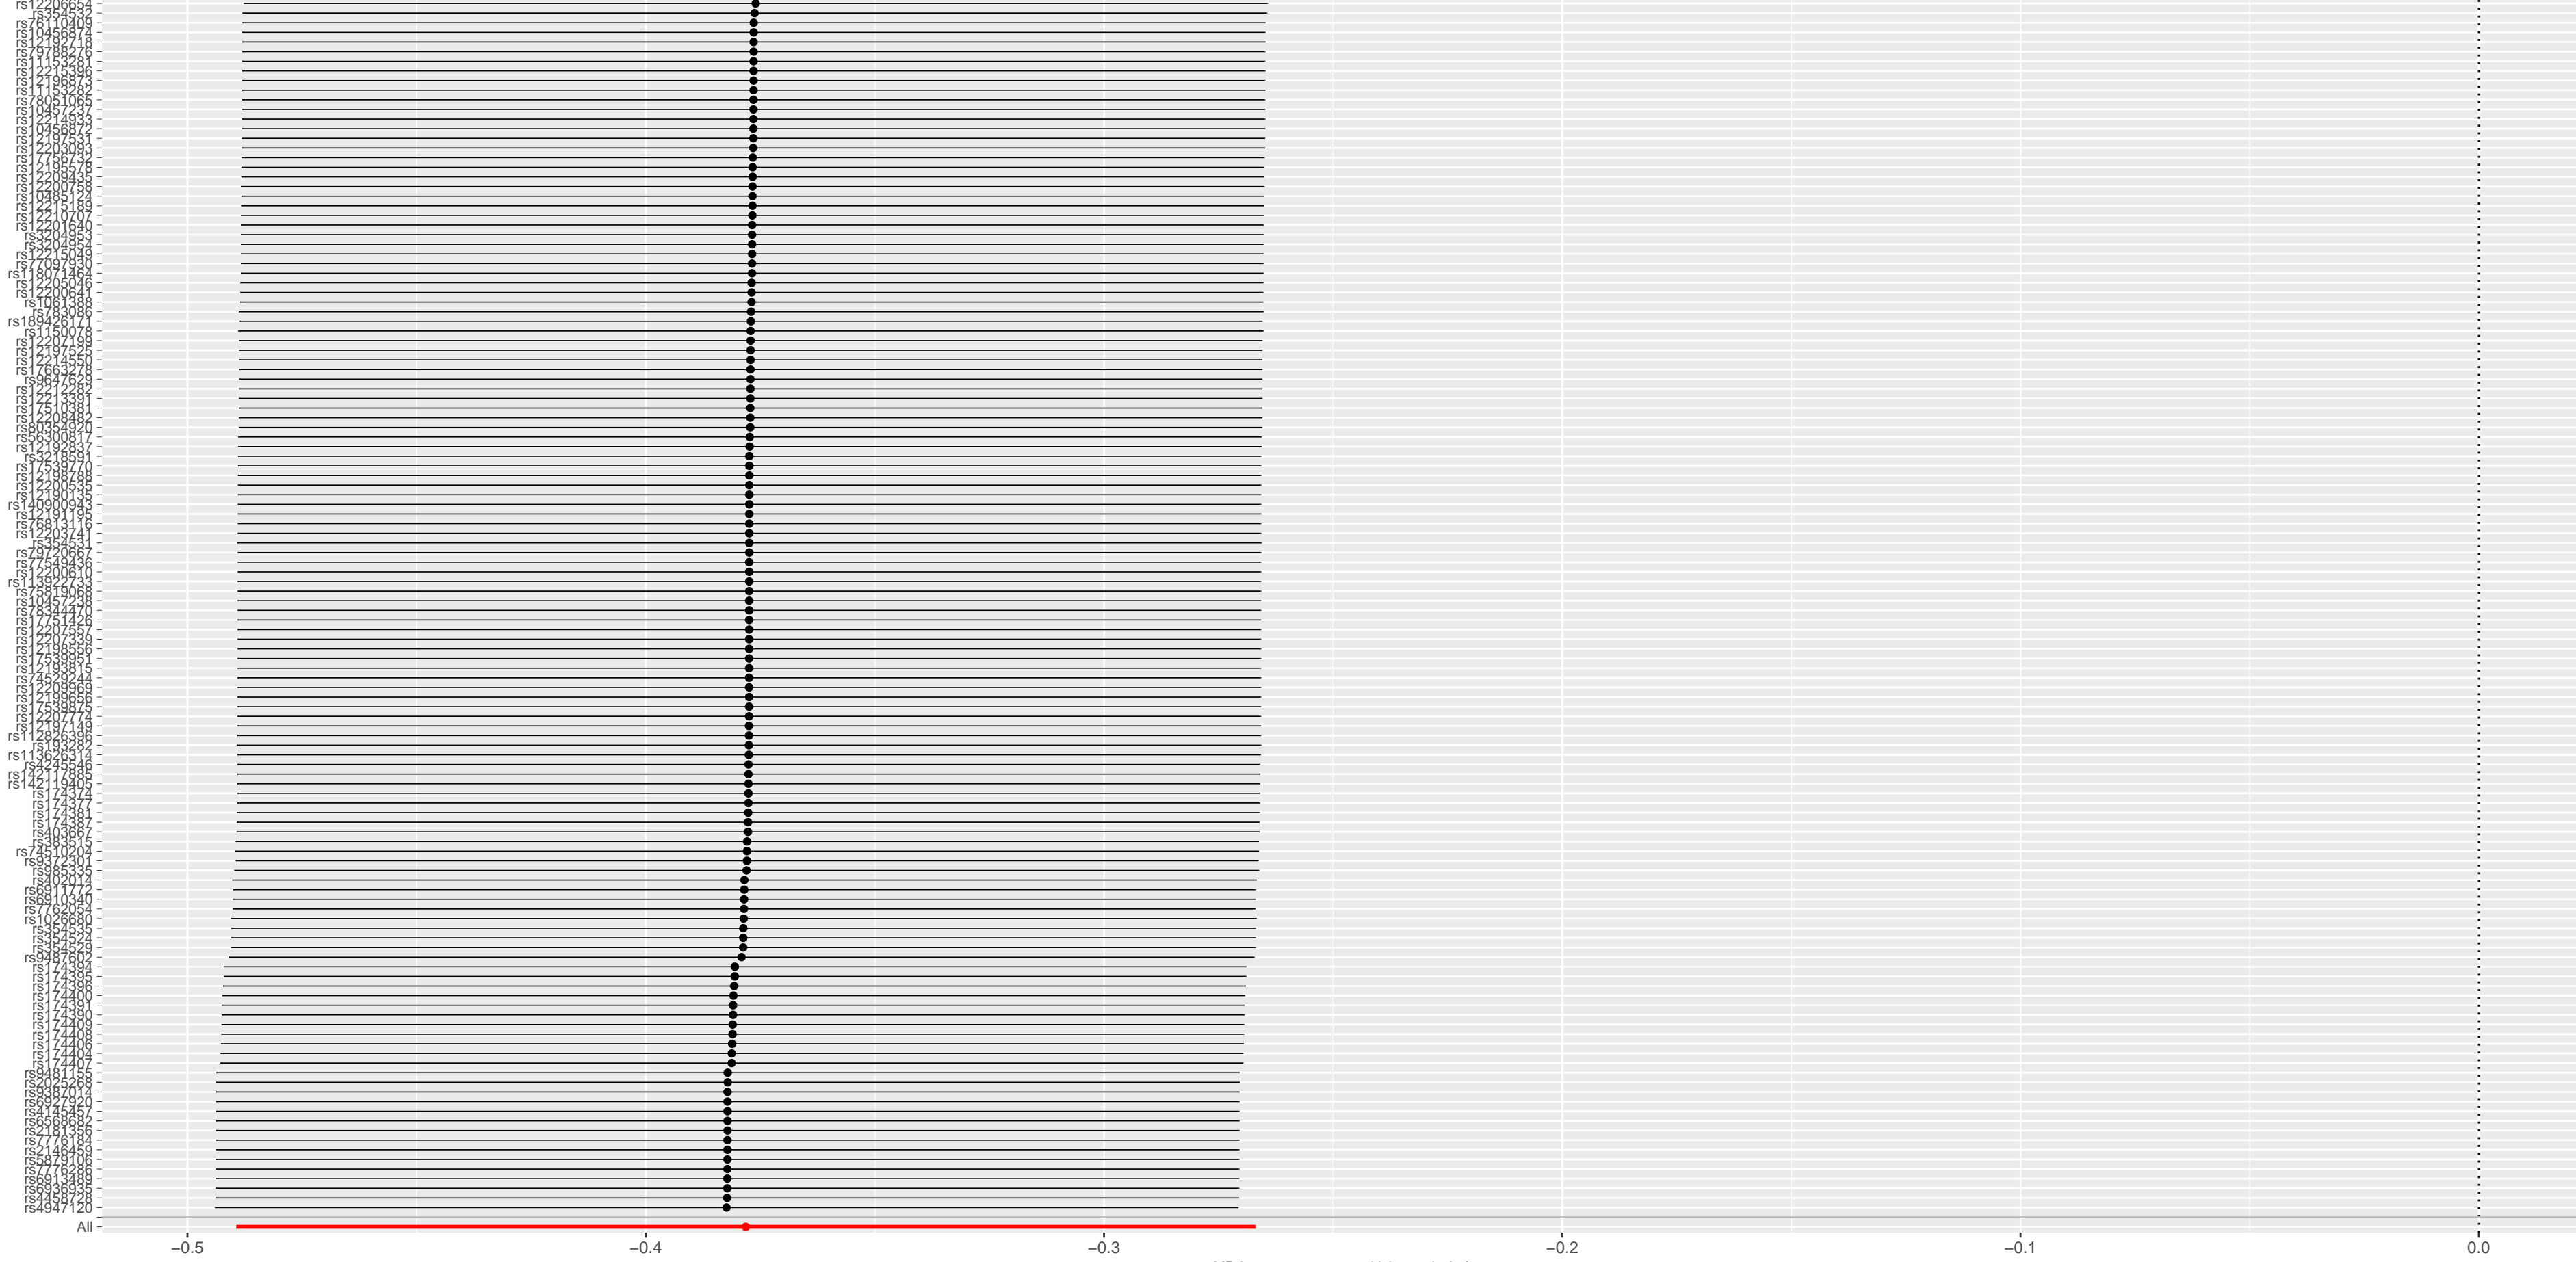

MR leave-one-out sensitivity analysis for 'Tryptophan' on 'Crohn's disease patients in KELA-register (KELA code 209, or 208 with ICD K50) || id:finn-b-K11\_KELACROHN'
